# Supplementary material for: Genomic variations and epigenomic landscape of the Medaka Inbred Kiyosu-Karlsruhe (MIKK) panel
Source: PubMed Central journal article supplement (PMC8862245; doi:10.1186/s13059-022-02602-4), 2022-02-21

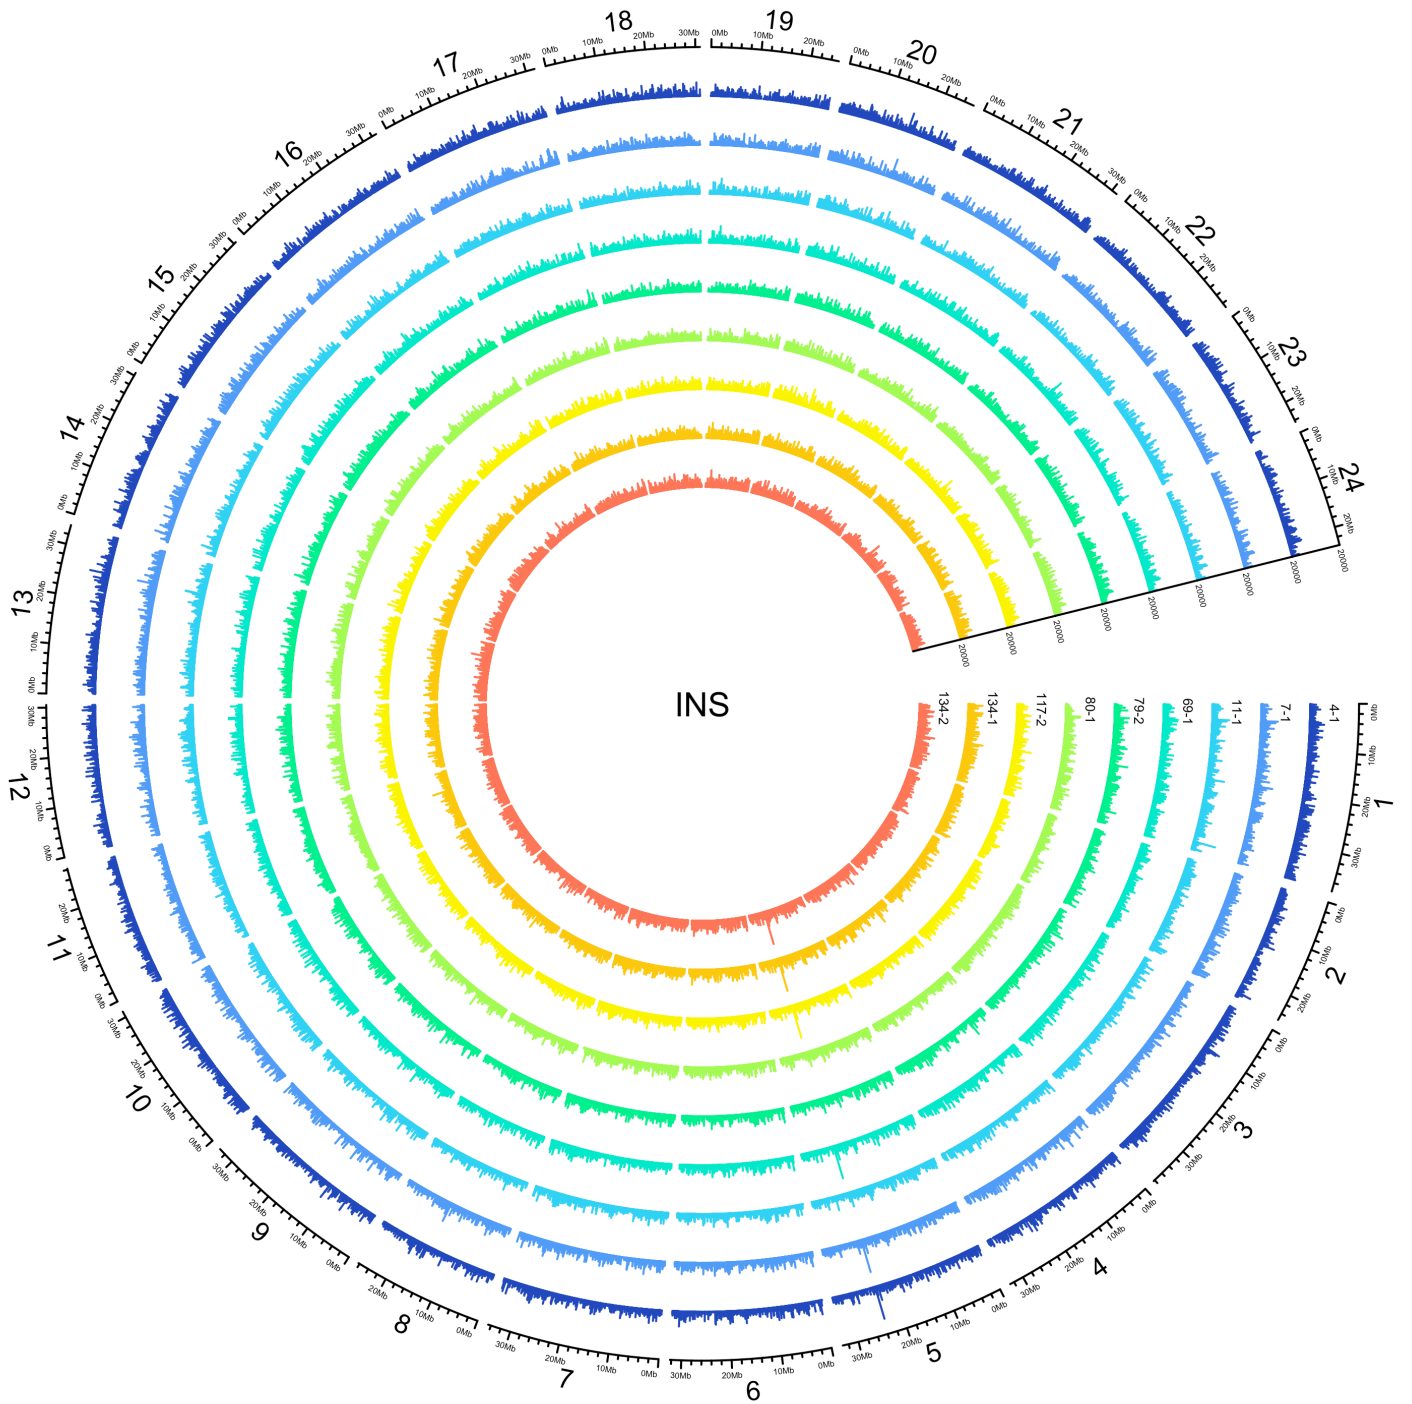

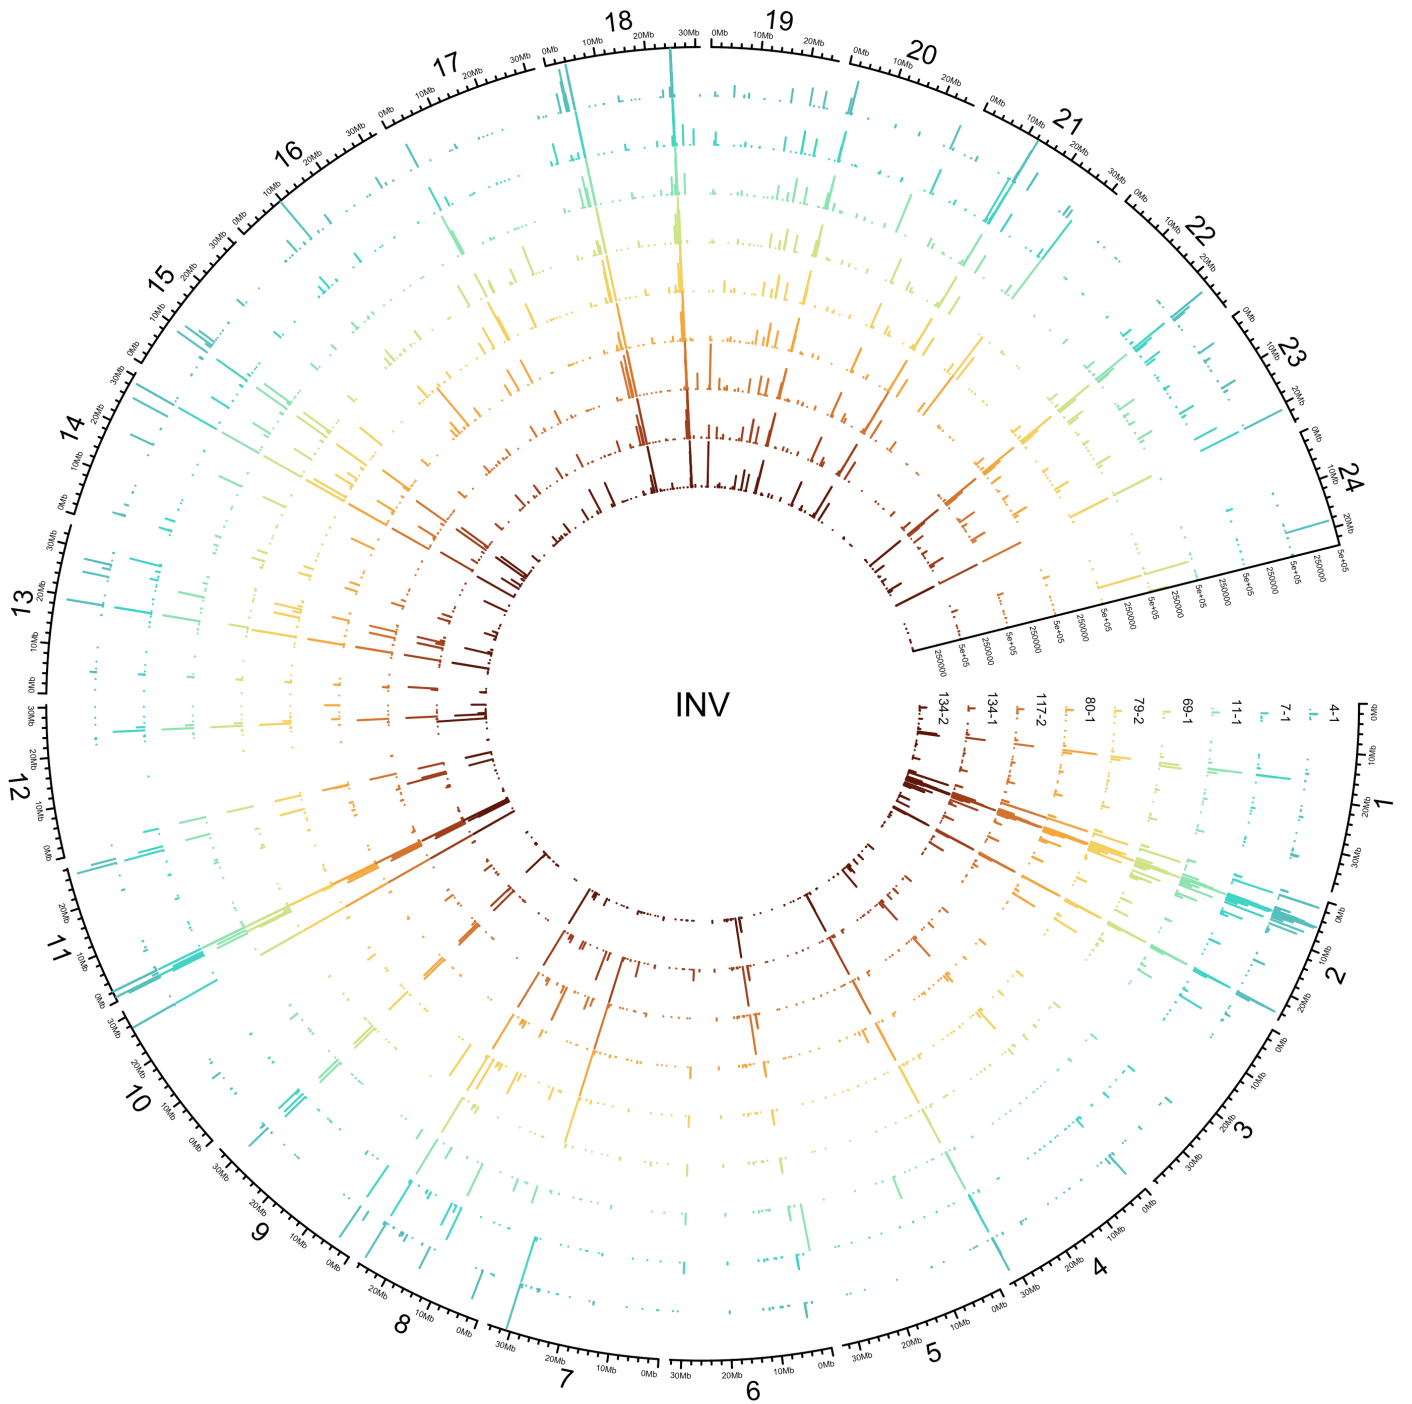

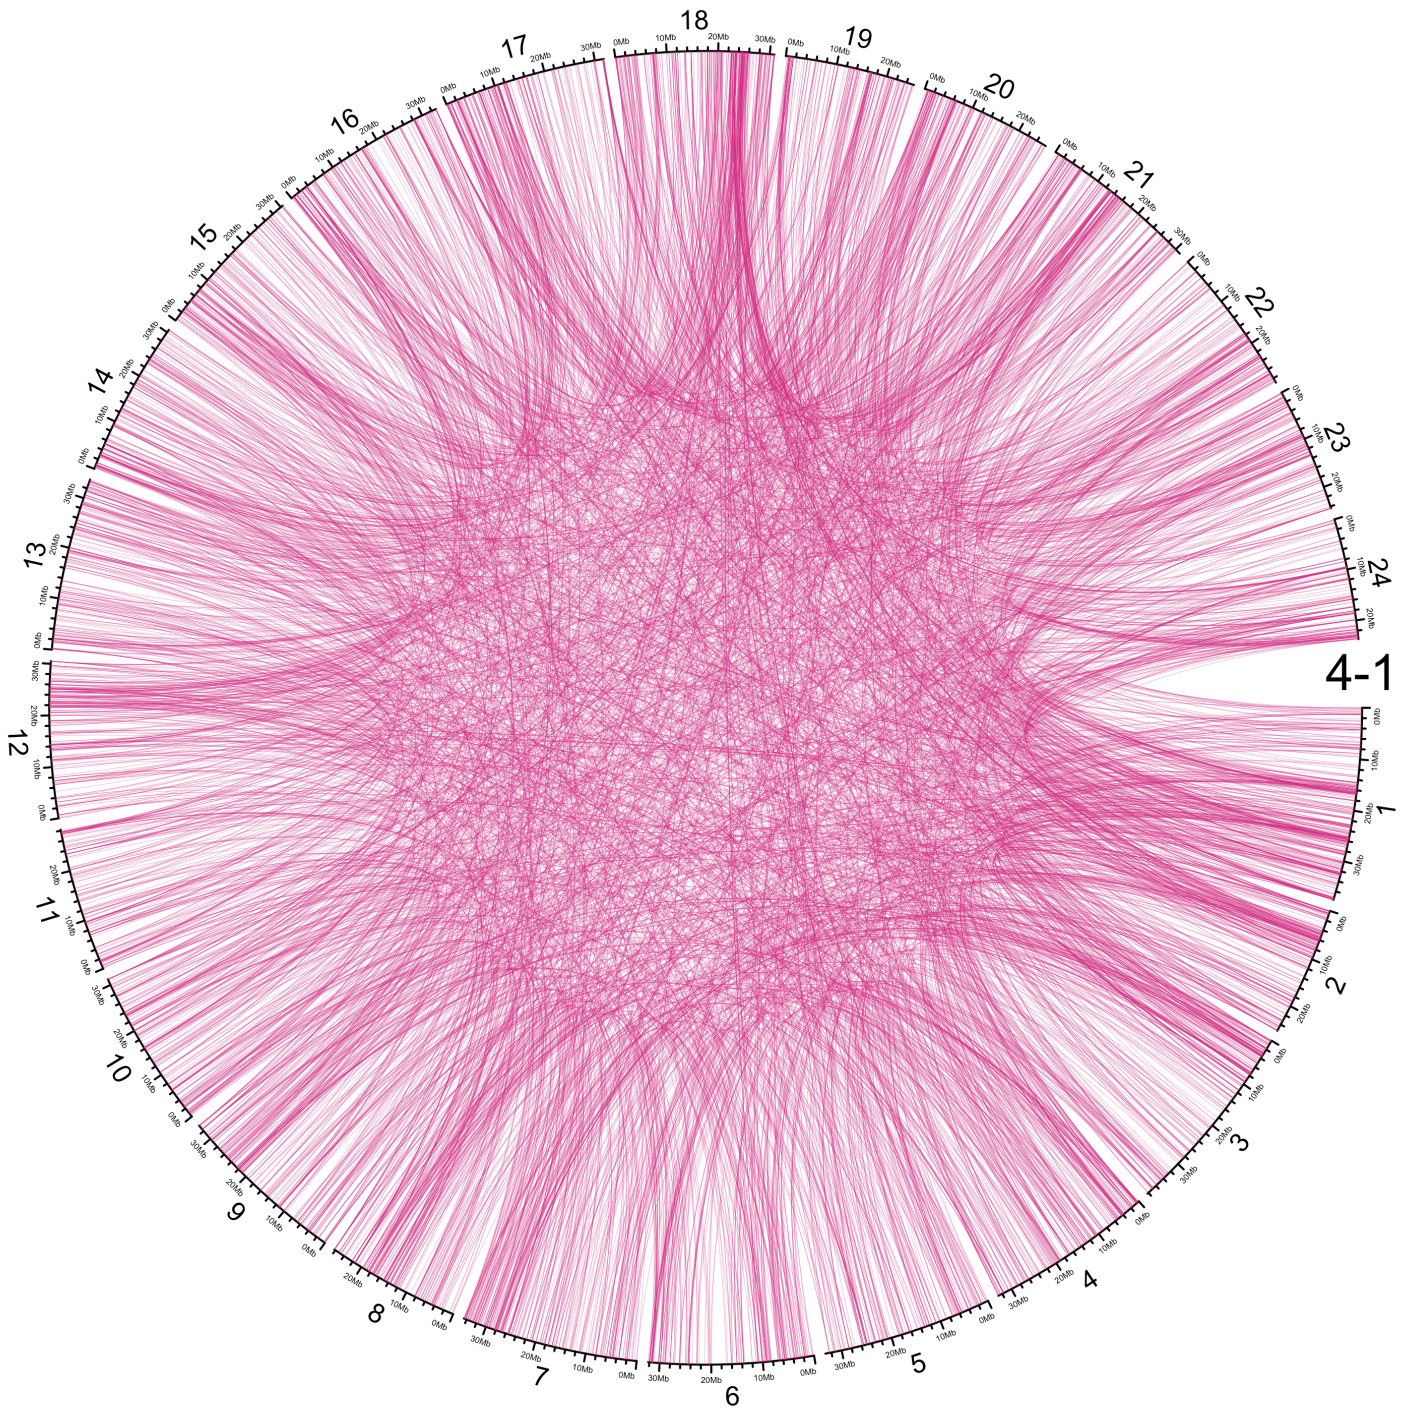

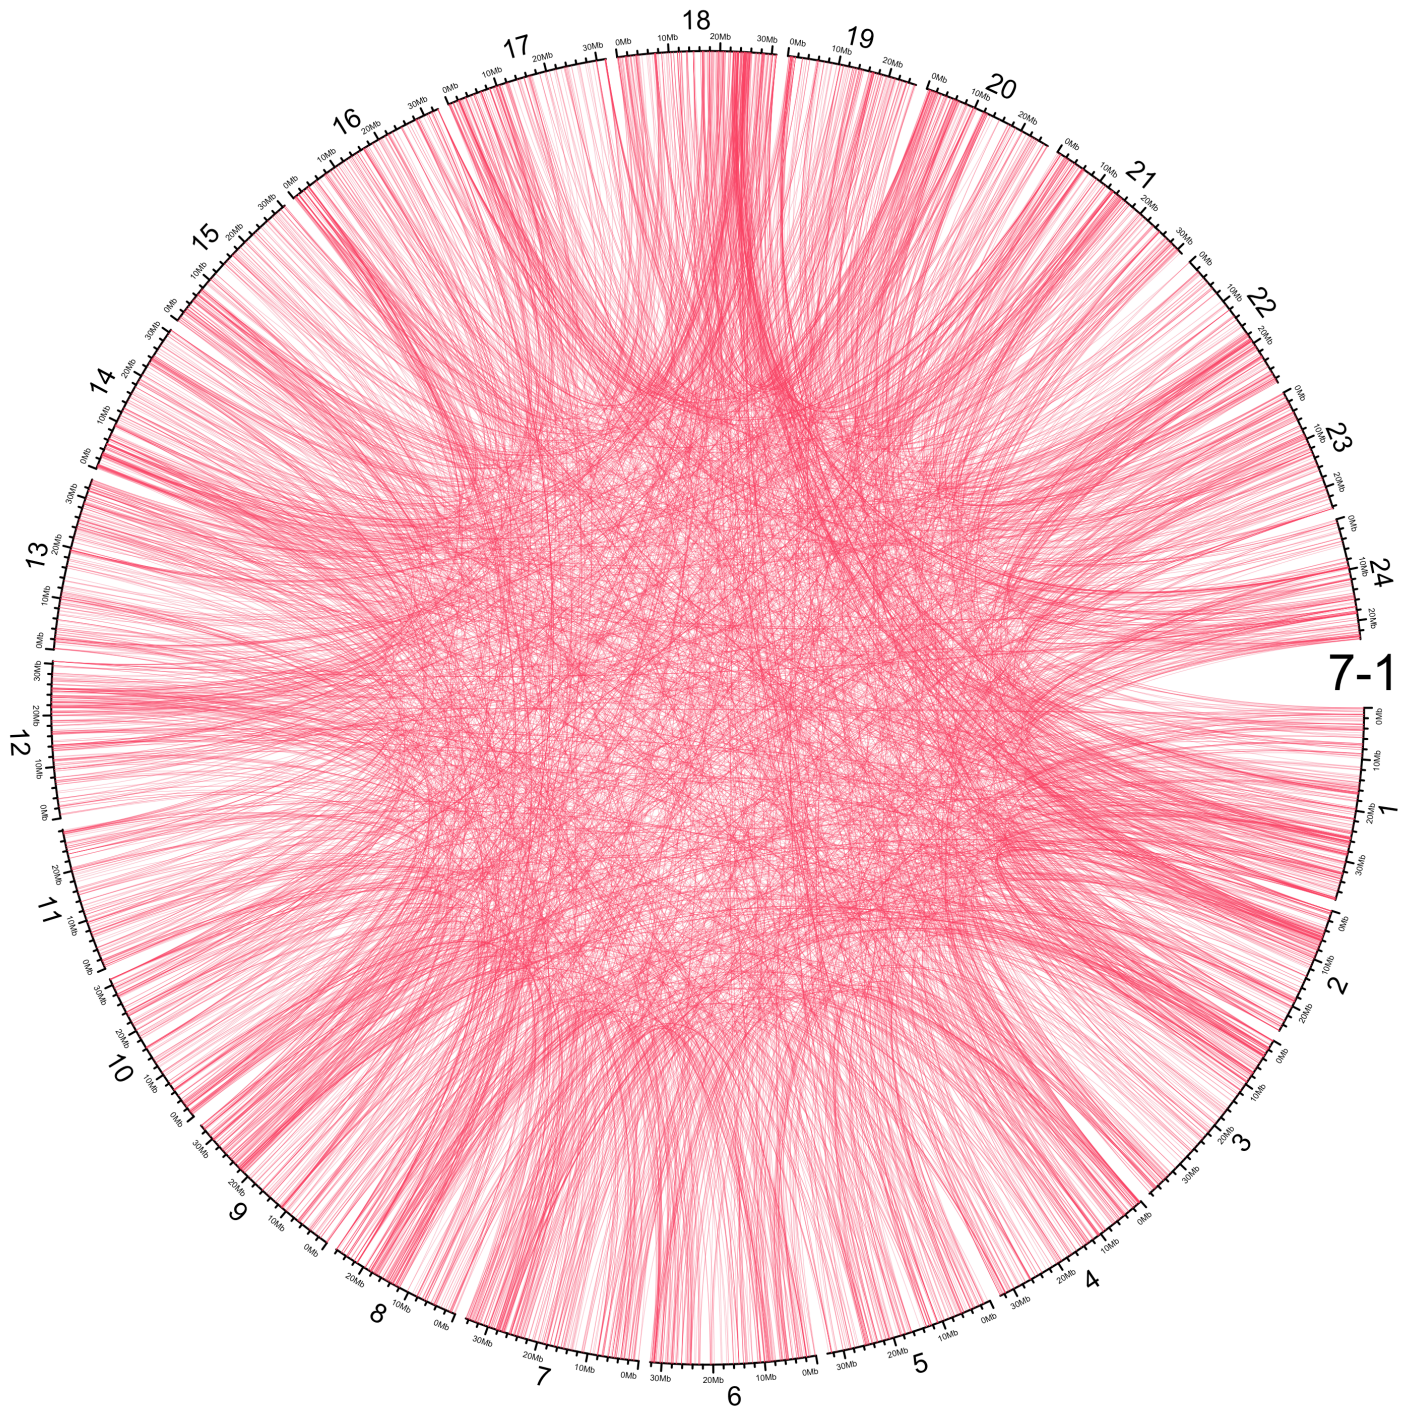

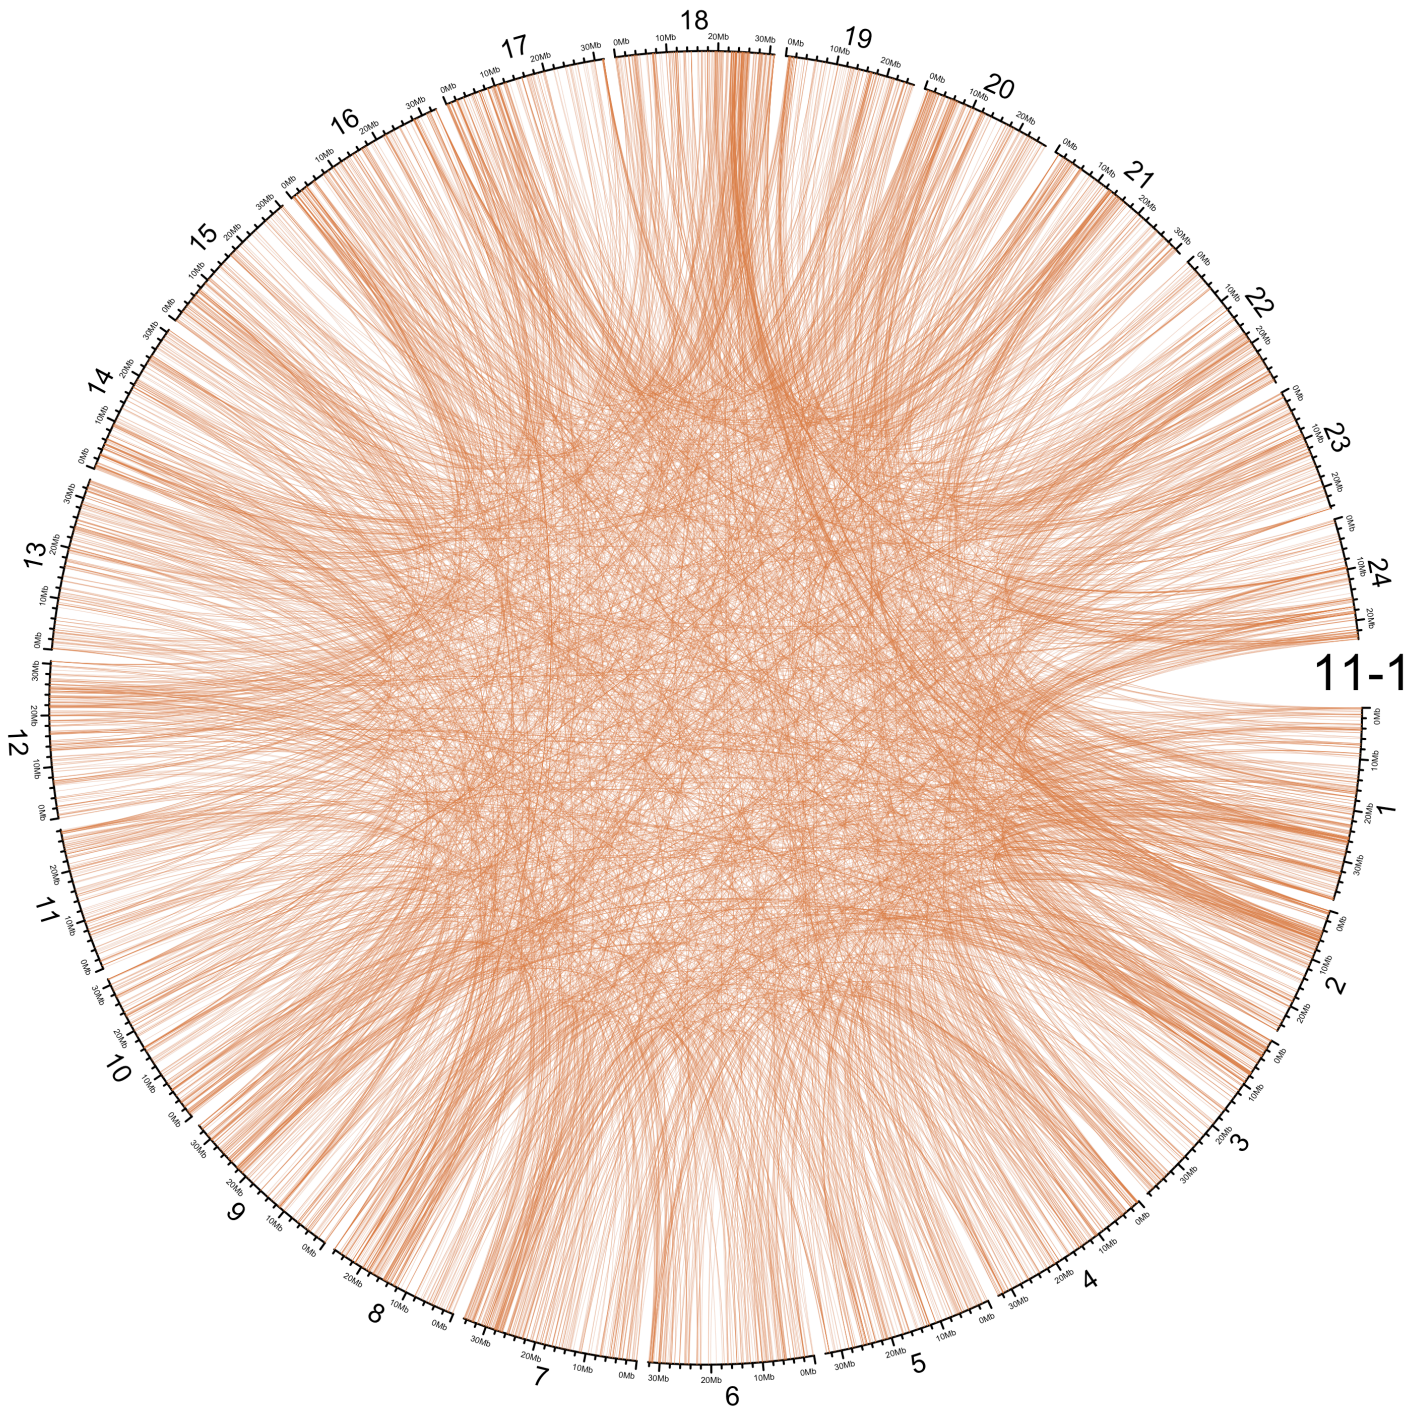

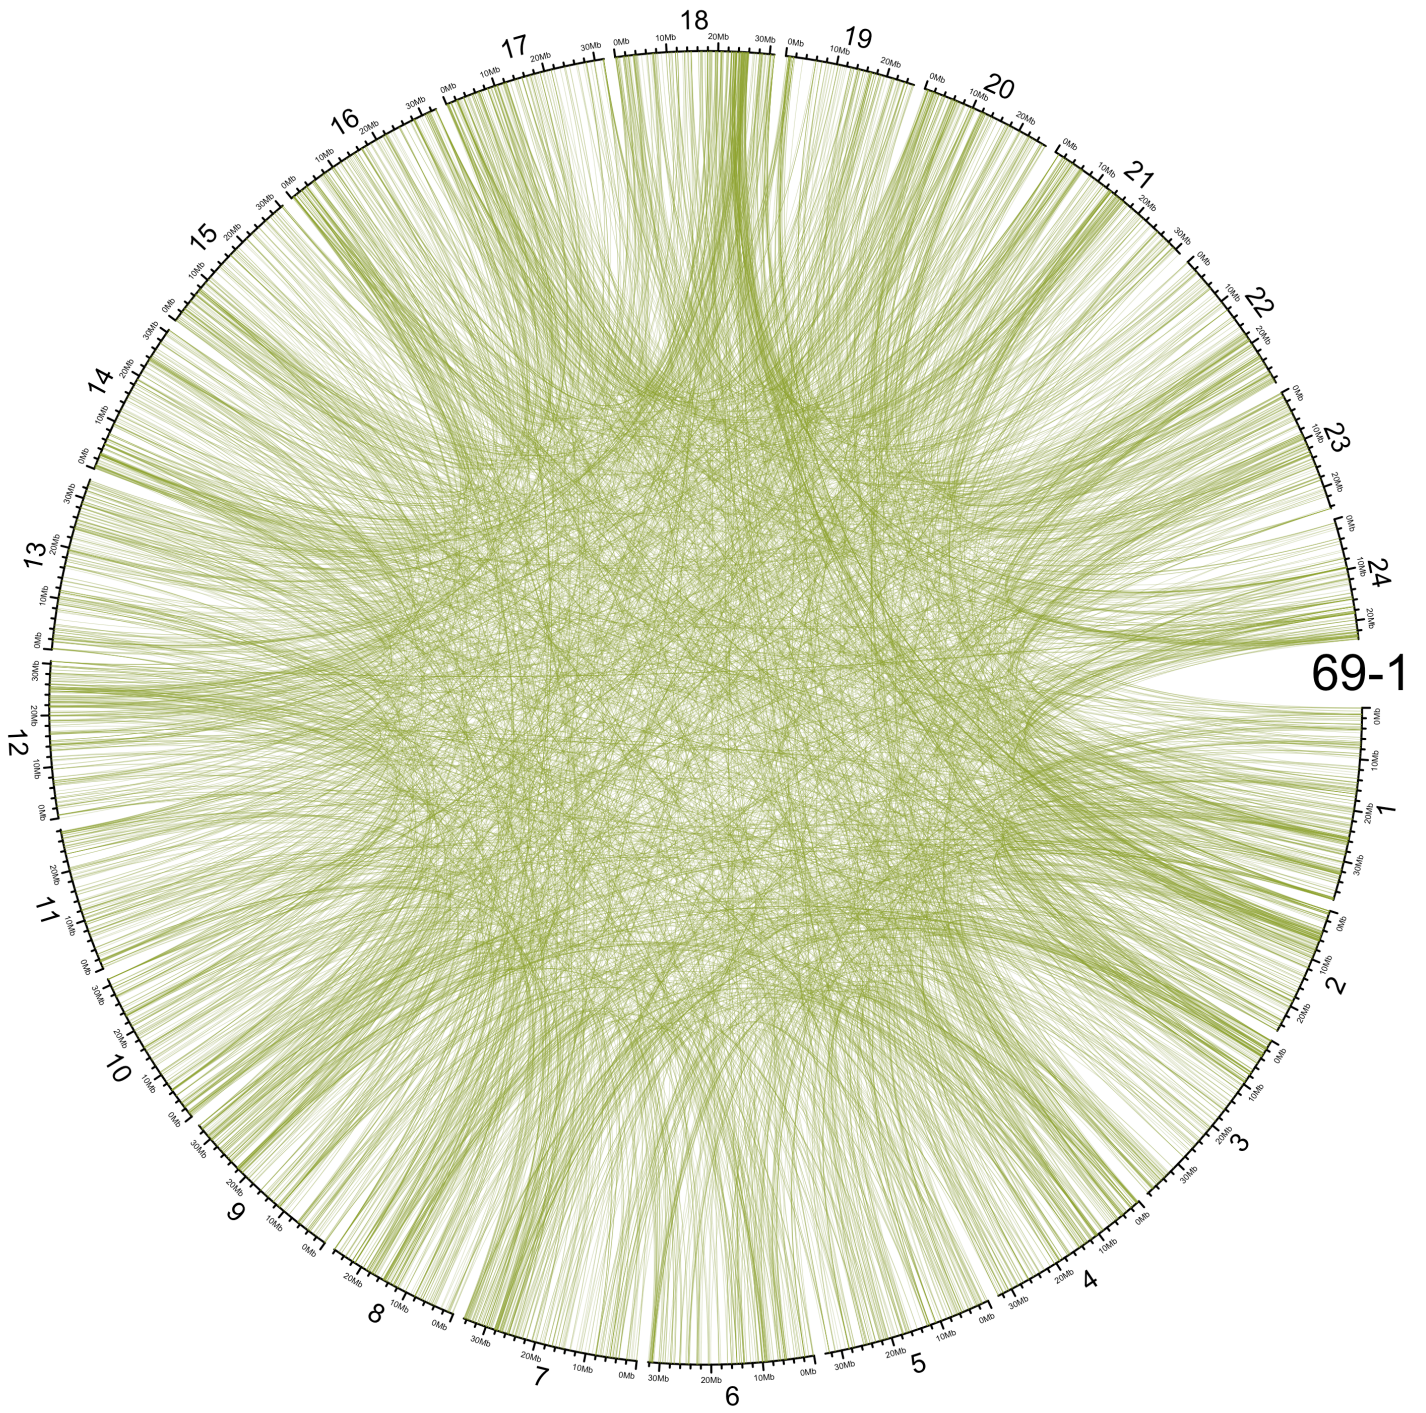



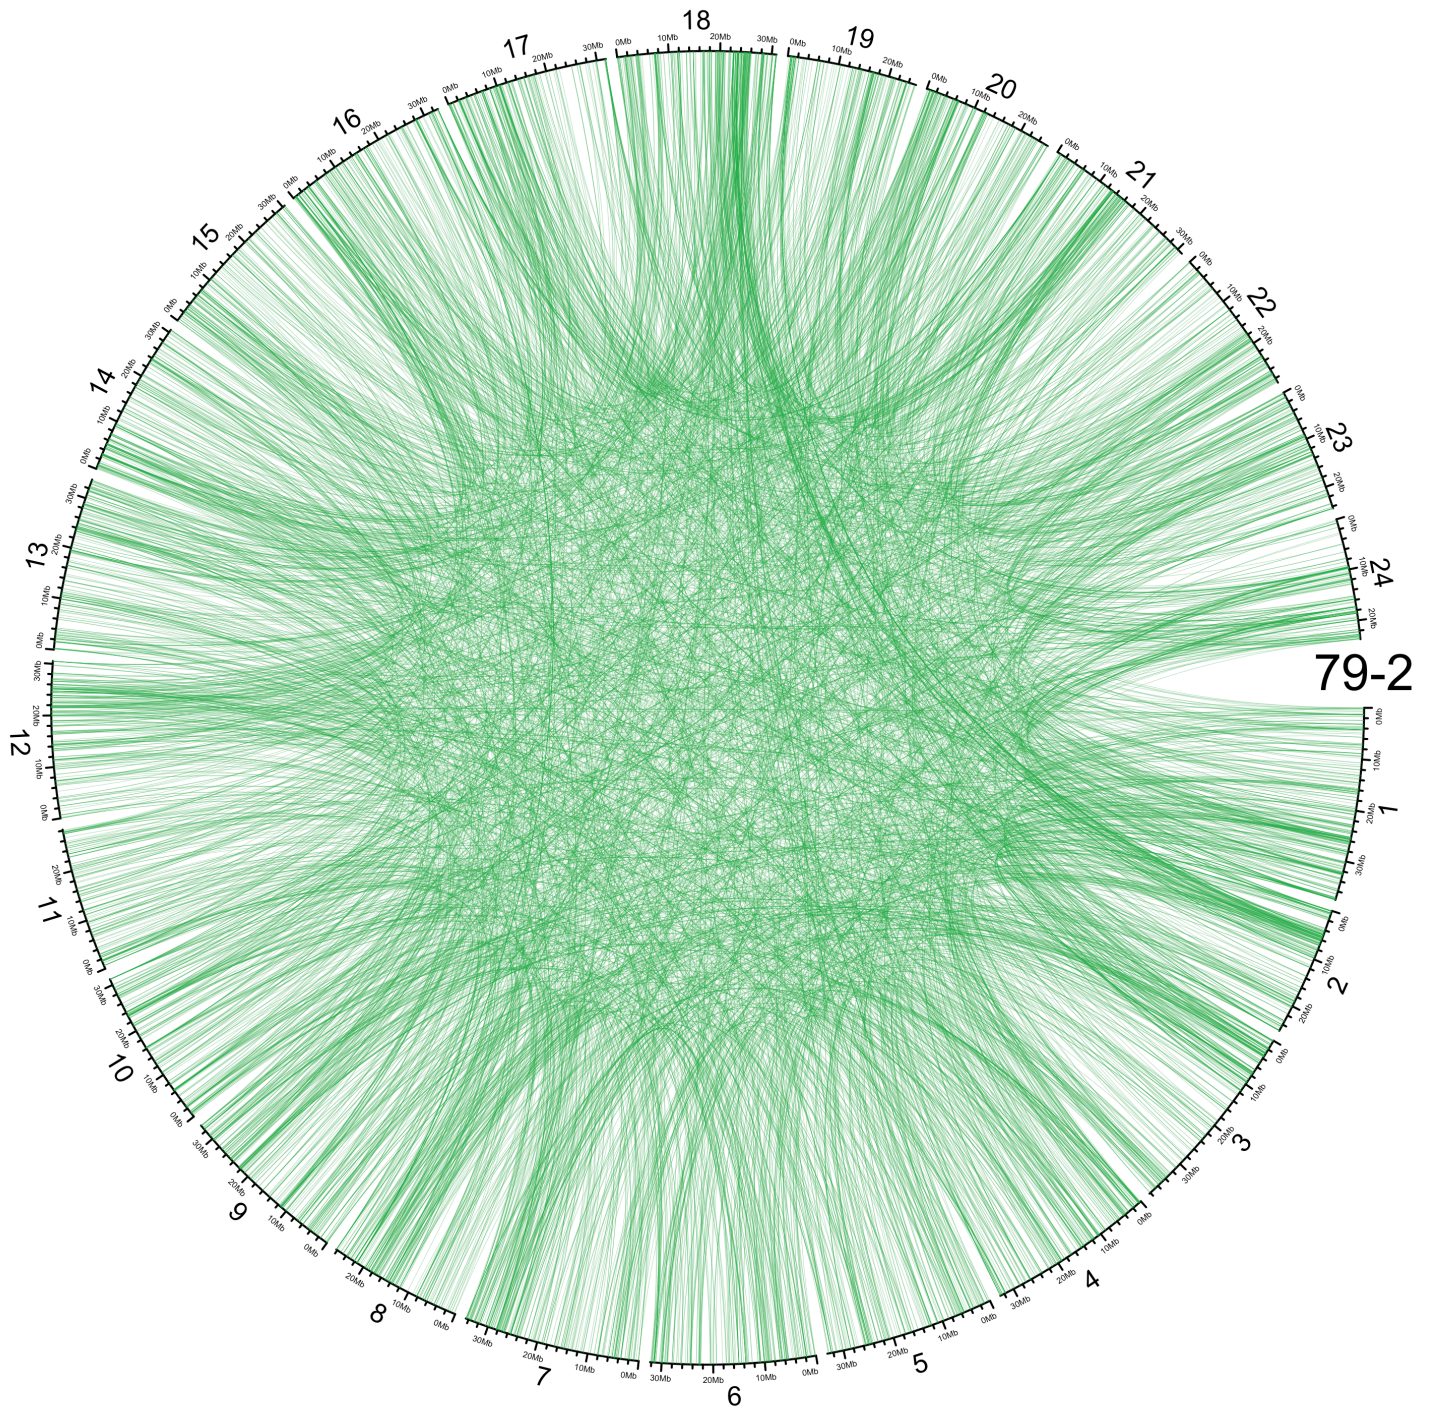

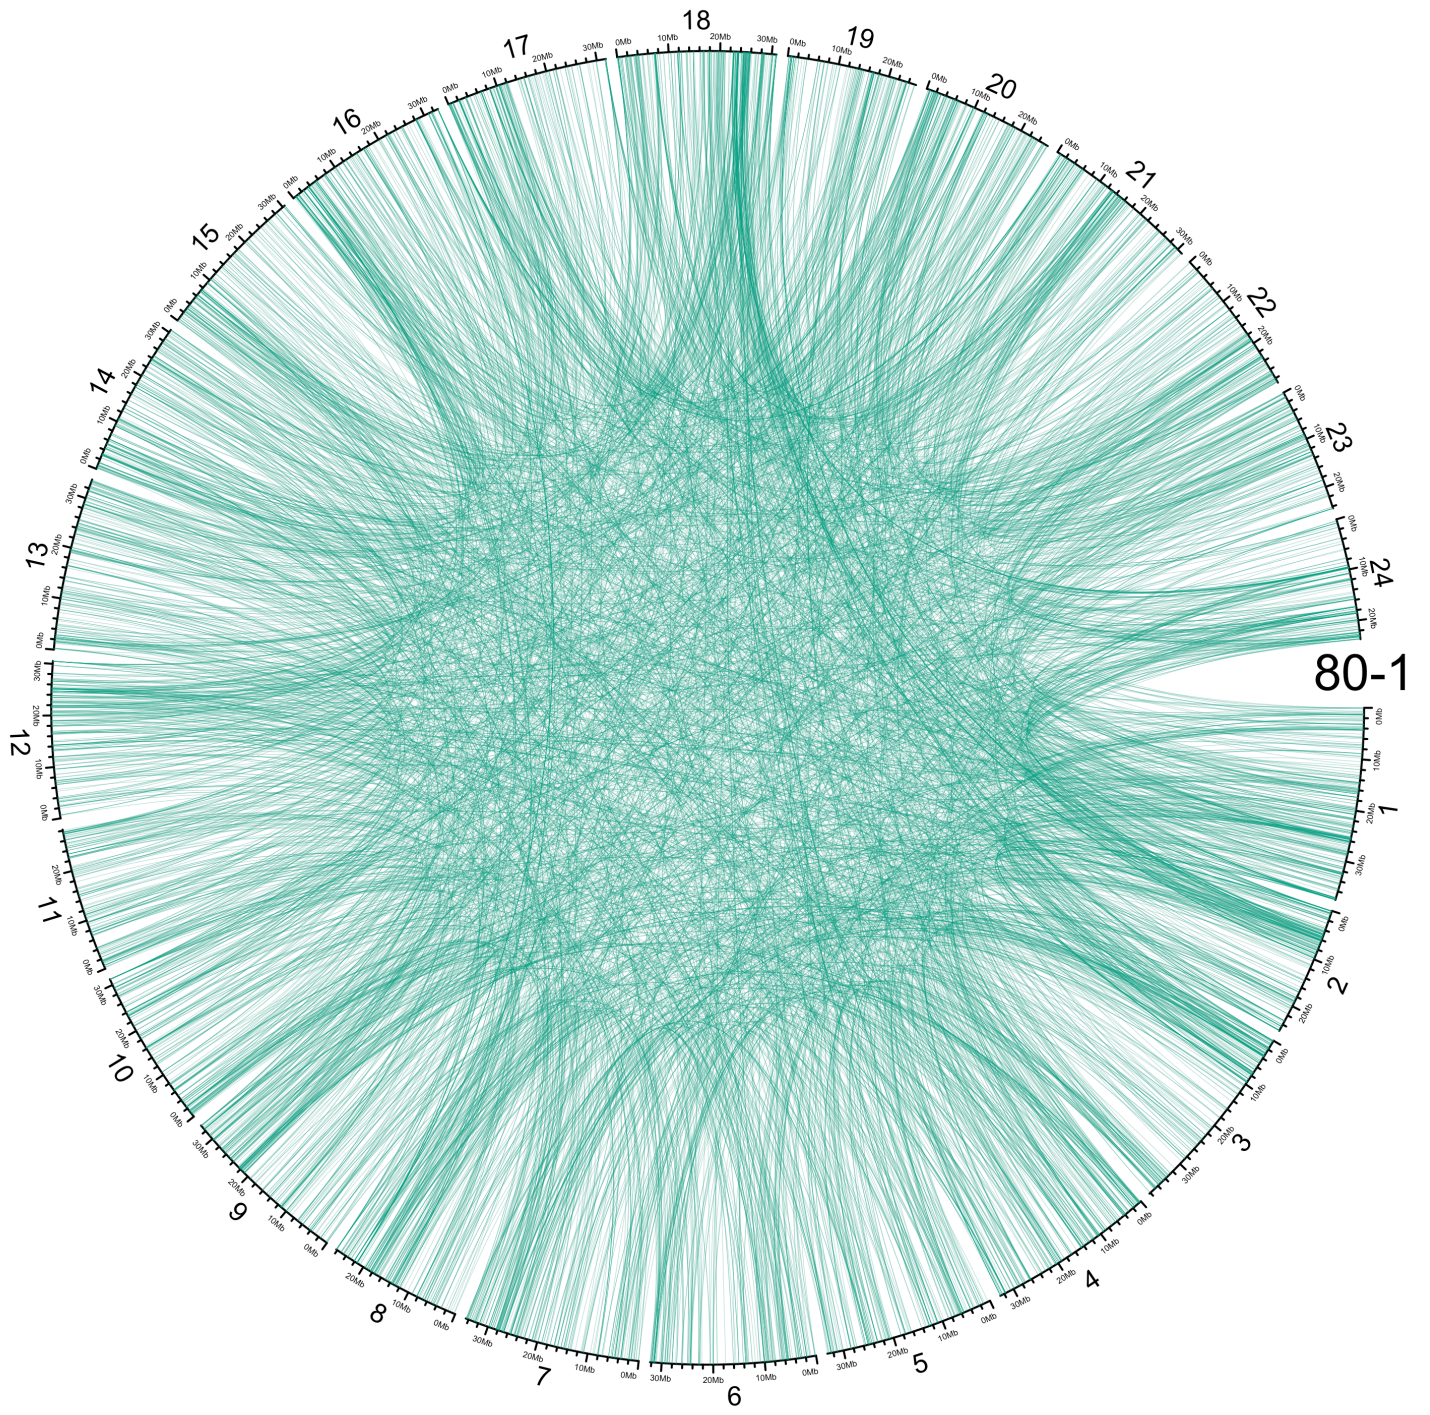

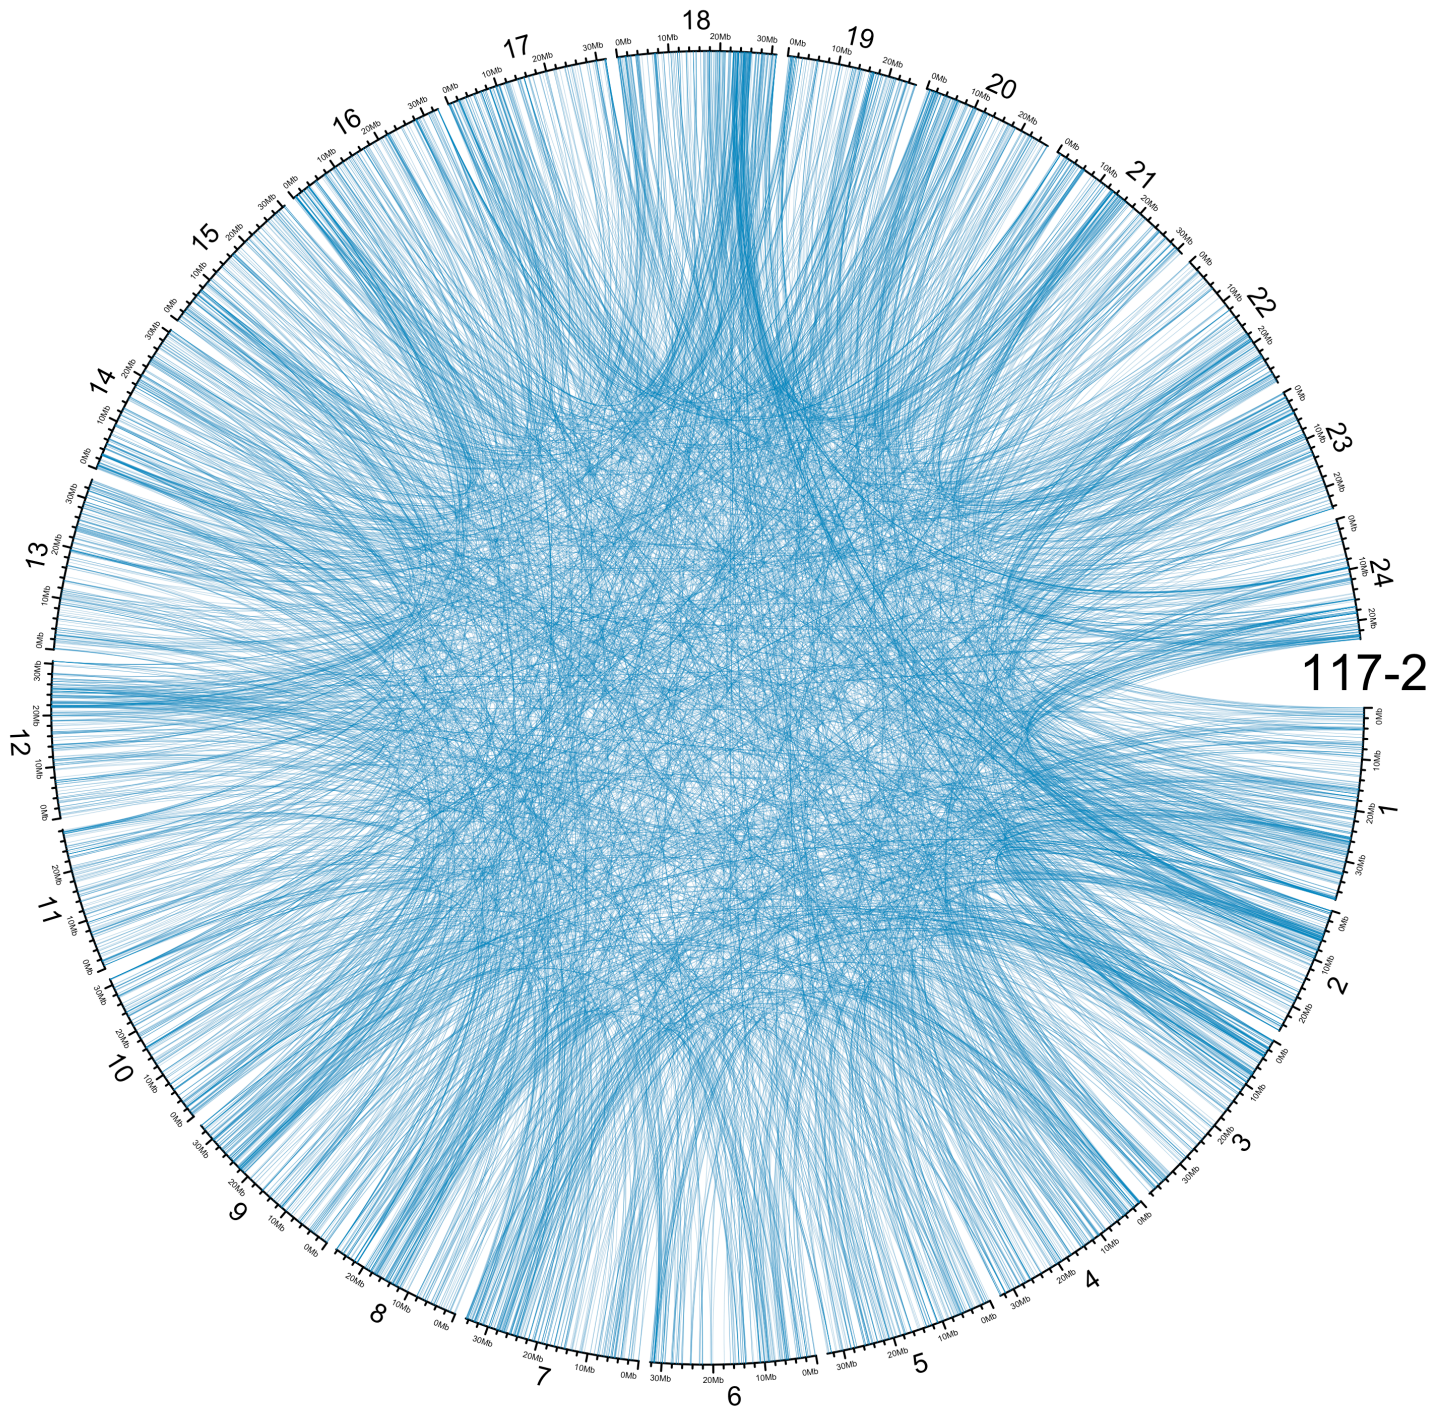

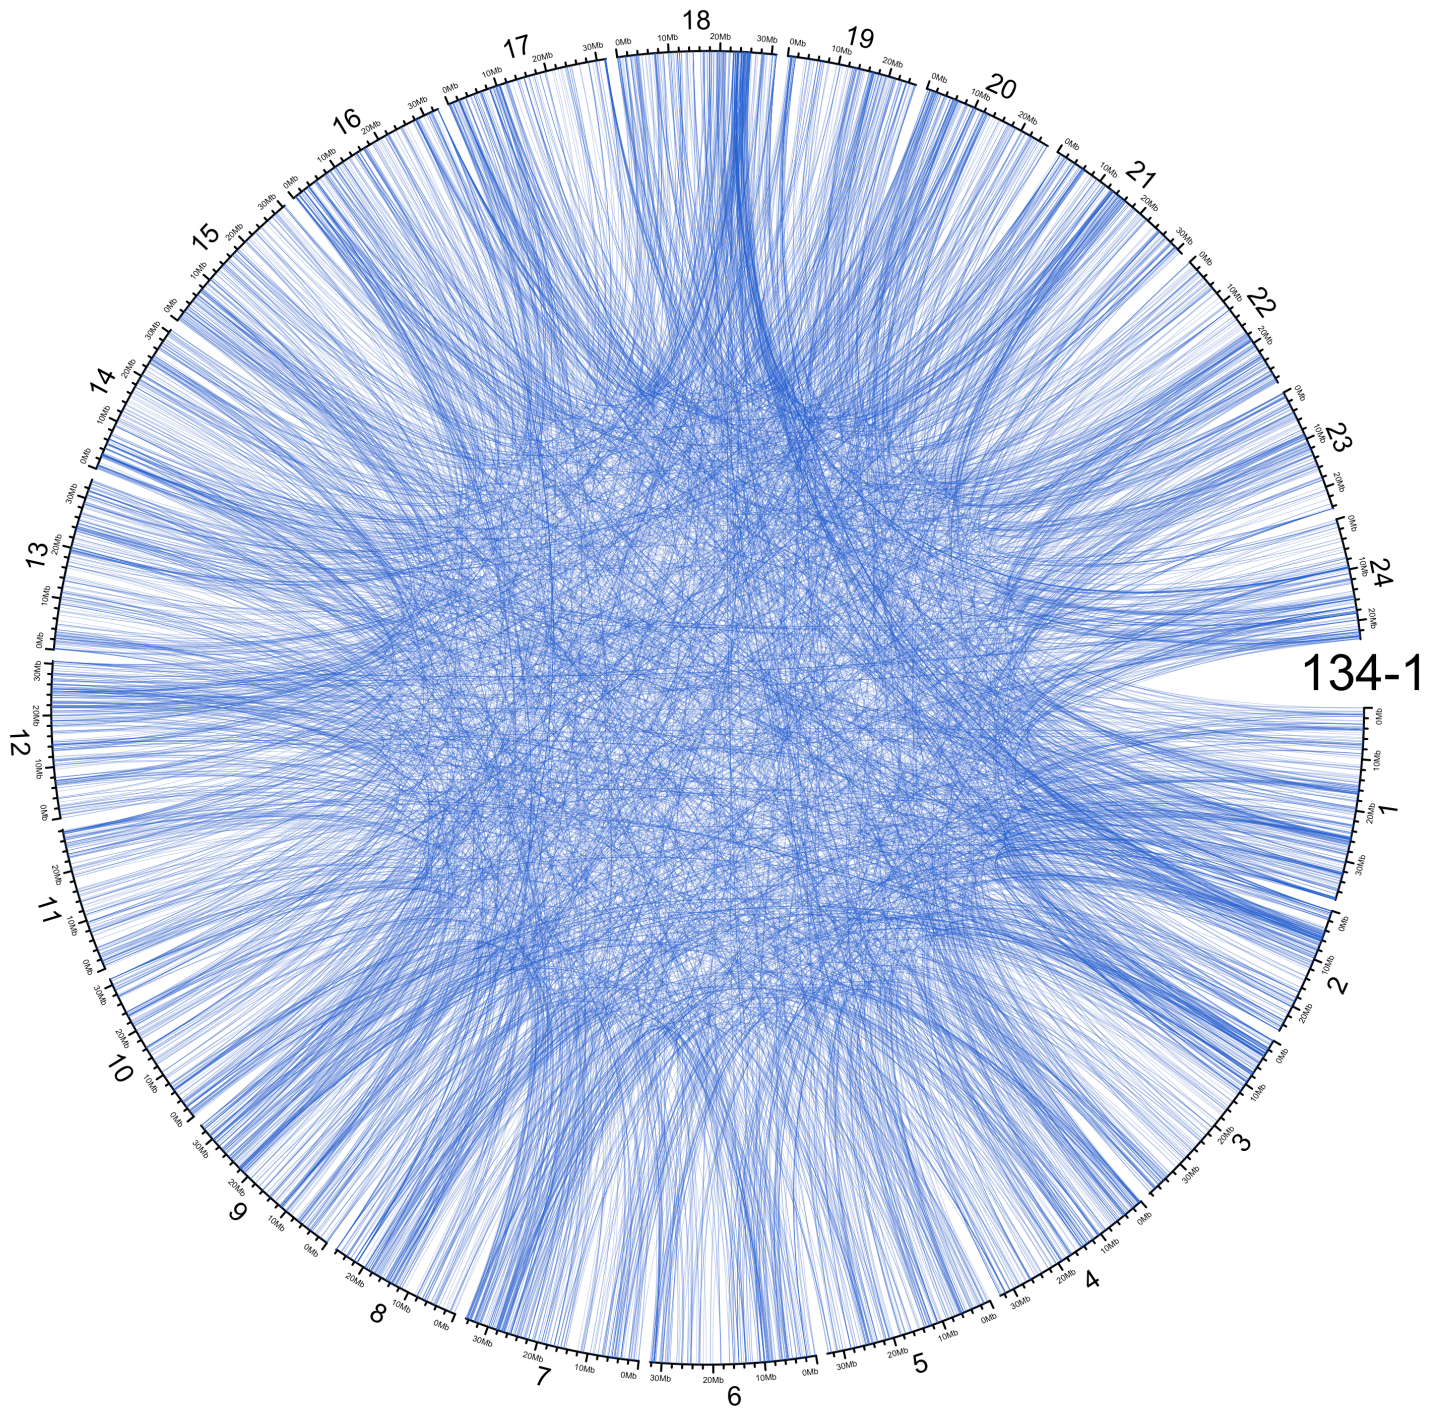

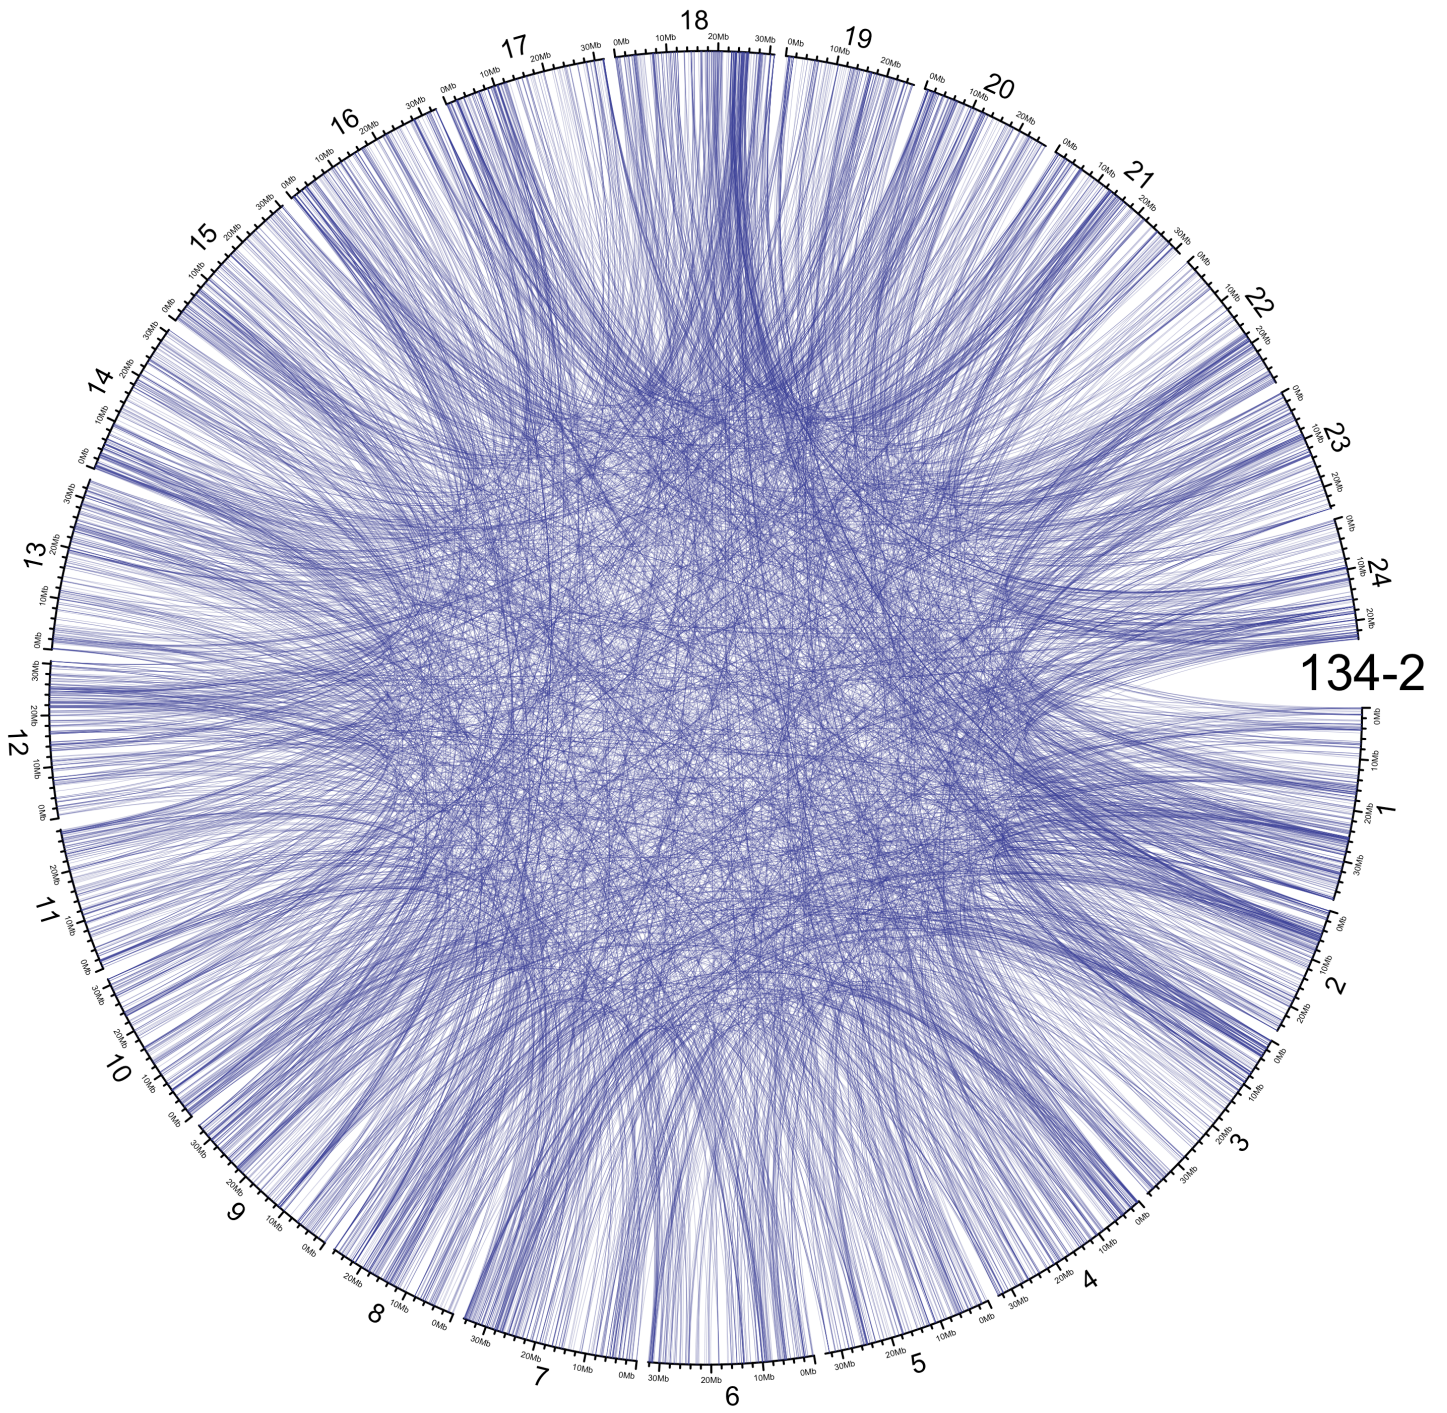

Supplement: 13059_2022_2602_MOESM8_ESM.pdf [file 13059_2022_2602_MOESM8_ESM.pdf]
